# Supplementary material
Source: PubMed Central journal article supplement (PMC8179024)
Supplement: kwaa070_foerster_web_material_final.pdf [file kwaa070_foerster_web_material_final.pdf]

# **WEB MATERIAL**

## **Few Losses to Follow-up in Sub-Saharan African Cancer Cohorts via Active Mobile Health Follow-up**

### **The African Breast Cancer—Disparities in Outcomes Study**

Milena Foerster, Angelica Anele, Charles Adisa, Moses Galukande, Groesbeck Parham, Annelie Zietsman, Christopher Sule Oyamienlen, Kingsley Chukwunyere Iwuoha, Esther Ezeigbo, Evelyn Bakengesa, Agnes Kaggwa, Allen Naamala, Anne Nteziryayo, Teopista Nakazibwe, Leeya Pinder, Emily Walubita, Johanna Pontac, Benjamin O. Anderson, Fiona McKenzie, Joachim Schuz, Isabel dos Santos Silva, and Valerie McCormack

#### Contents:

Web Appendix

Web Table 1

Web Figures 1 and 2

## WEB APPENDIX

### Predictor Variables for the Competing-Risks Regression Models

Predictor variables for the competing risks regression models were obtained in the baseline questionnaire and included:

TNM stage at diagnosis: stages I/II combined (as stage I was rare), stage III, stage IV, and unknown stage

Age at diagnosis: linear and categorized into <35, 35-45, 45-55, 55-65, and  $\geq 65$  years

Country-specific socioeconomic position (SEP): country-specific SEP categories (low, middle and high) which were constructed based on thirds (as far as possible) of each country's distribution of a numeric SEP score derived from combining the following self-reported possessions and facilities: home ownership, indoor water, flush toilet, electricity, vehicle, refrigerator, landline, gas or electric stove, and bed; plus belief in traditional medicine (yes/no)

Distance to hospital: Distance to the hospital was calculated as the straight-line distance between the diagnostic/treatment hospital and the woman's home residence, after geocoding their addresses. The effect of a linear trend per 100-km increase in distance was estimated.

HIV-positive: as reported by women, HIV-positive vs. HIV-negative/HIV-not known

Any non-HIV comorbidity: having at least one of the following conditions: hypertension, heart disease, diabetes, chronic anaemia, chronic obstructive pulmonary disease (COPD, e.g. chronic bronchitis, emphysema), asthma, hepatitis B or C, tuberculosis, other chronic infection, other cancer, or other chronic disease

Residential area: living in an urban area (city/town) vs. a rural area (village/rural)

Knows anyone with breast cancer: having a friend or relative with breast cancer vs. not

Not married: currently not married vs. currently married

Employment status: employment as highly skilled/skilled or unskilled/not applicable (containing e.g. the informal work sector and housewives)

Education: low (no education/secondary education) vs. high (tertiary education/university)

Thinks breast cancer is treatable/curable: yes vs. no/don't know

Believes in traditional medicine: yes/no

Believes in spiritual healing: yes/no

**Web Table 1.** Mean durations (months) between consecutive successful follow-up (FUP) interviews for women who had had more than 10 FUPs vs. those who had had 10 or fewer FUPs, in the African Breast Cancer—Disparities in Outcomes (ABC-DO) Study

| FUP No. | Participants With >10 FUP Interviews |      |          |          | Participants With ≤10 FUP Interviews |      |          |          |
|---------|--------------------------------------|------|----------|----------|--------------------------------------|------|----------|----------|
|         | No.                                  | Mean | Lower CL | Upper CL | No. <sup>a</sup>                     | Mean | Lower CL | Upper CL |
| 1       | 195                                  | 3.11 | 3.03     | 3.19     | 1,111                                | 4.03 | 3.95     | 4.11     |
| 2       | 195                                  | 3.12 | 3.04     | 3.21     | 1,110                                | 4.03 | 3.95     | 4.11     |
| 3       | 195                                  | 3.11 | 3.03     | 3.20     | 965                                  | 3.97 | 3.90     | 4.05     |
| 4       | 195                                  | 3.05 | 2.97     | 3.13     | 843                                  | 3.89 | 3.82     | 3.95     |
| 5       | 195                                  | 3.14 | 3.07     | 3.22     | 691                                  | 3.80 | 3.74     | 3.86     |
| 6       | 195                                  | 3.06 | 2.98     | 3.13     | 565                                  | 3.71 | 3.65     | 3.77     |
| 7       | 195                                  | 3.07 | 3.00     | 3.14     | 465                                  | 3.62 | 3.56     | 3.67     |
| 8       | 195                                  | 3.04 | 3.00     | 3.09     | 342                                  | 3.55 | 3.49     | 3.61     |
| 9       | 195                                  | 3.09 | 3.02     | 3.16     | 235                                  | 3.46 | 3.41     | 3.51     |
| 10      | 195                                  | 3.10 | 3.05     | 3.16     | 124                                  | 3.36 | 3.30     | 3.41     |

CL, confidence limit.

<sup>a</sup> No. of women having reached the *n*th follow-up of women having <10 follow-ups, i.e. all women dropping out at the respective follow-up number.

**Web Figure 1.** Programmed Protocol for mHealth Follow-up in the African Breast Cancer—Disparities in Outcomes (ABC-DO) Study. This flow diagram reflects the protocol programmed into an mHealth application which served as an efficient study management tool to manage follow-up of the ABC-DO cohort.

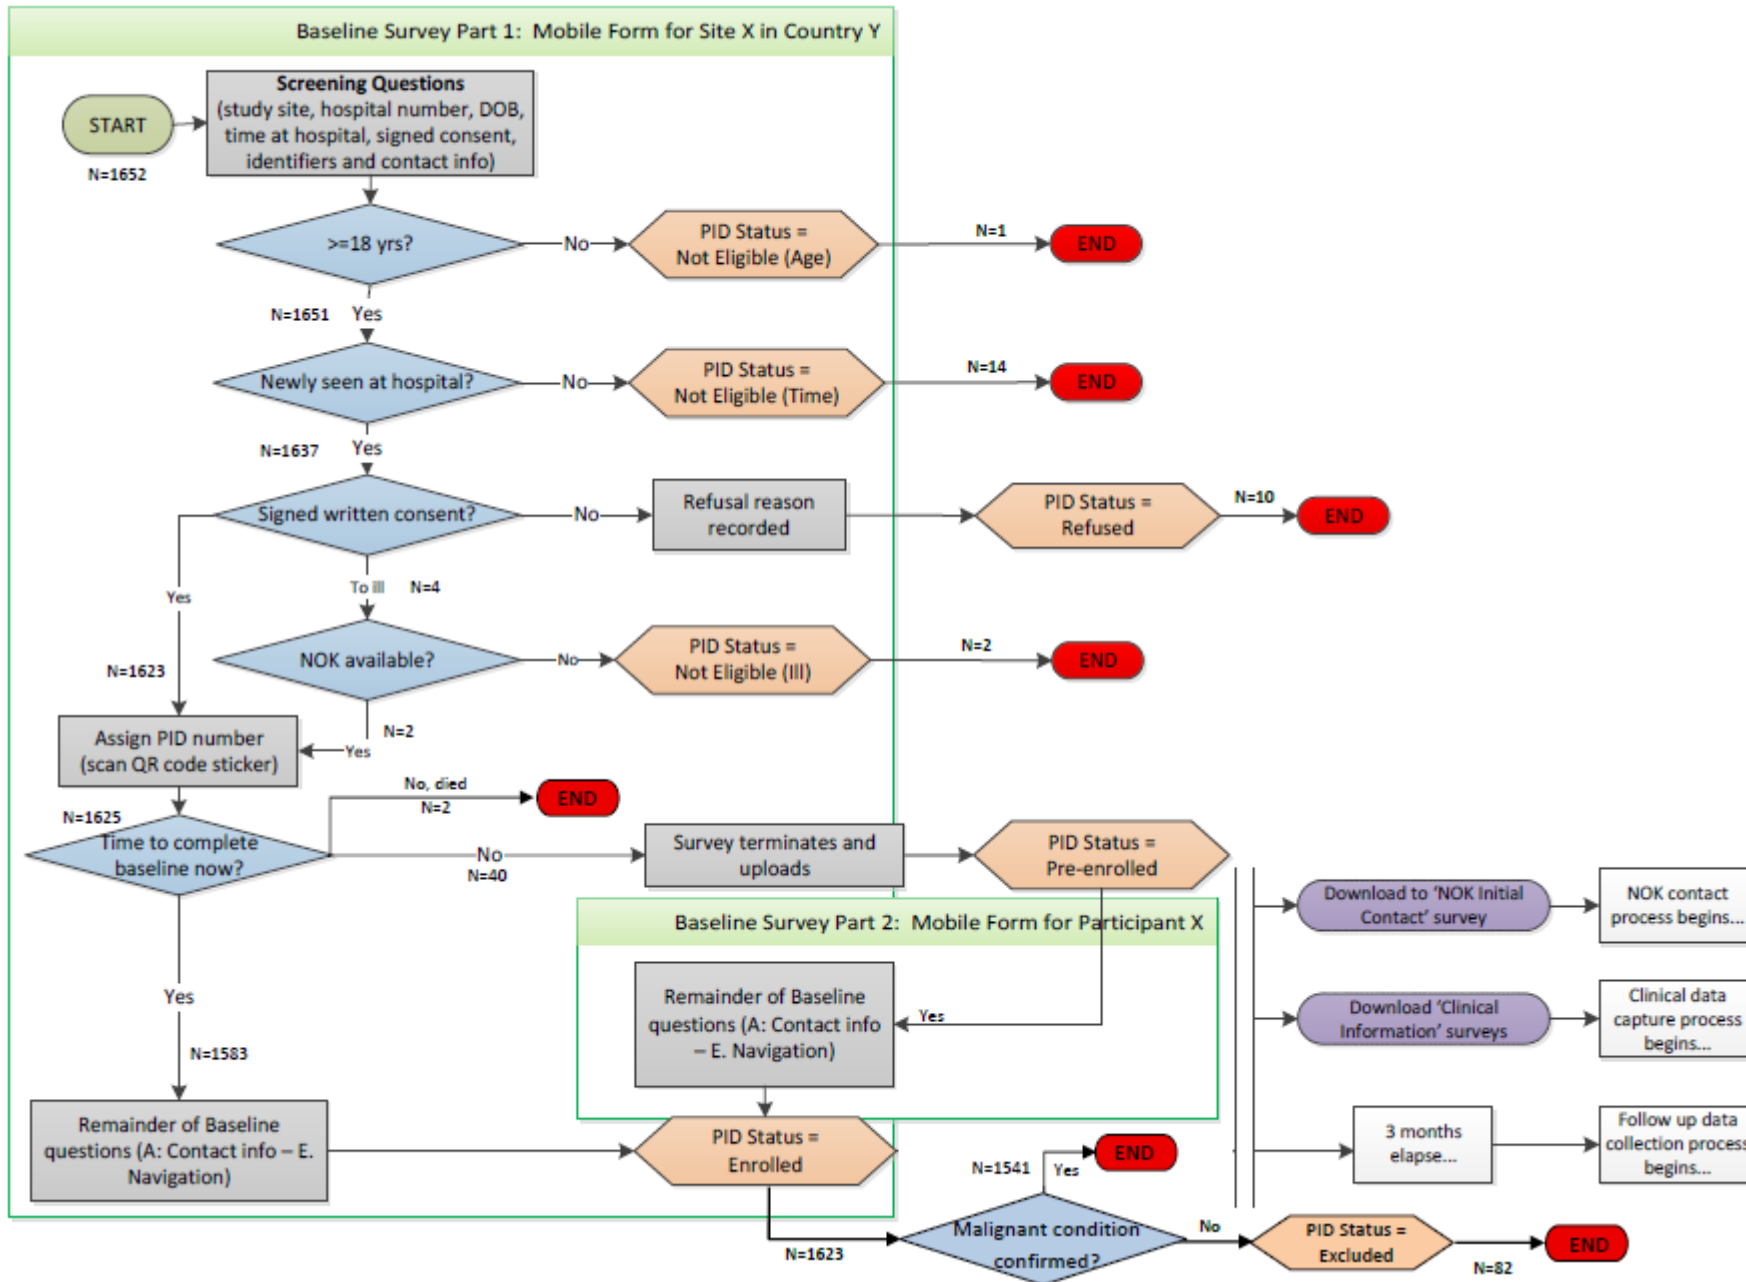

**Web Figure 2.** Follow-up Characteristics and Percentage Lost to Follow-up in the African Breast Cancer—Disparities in Outcomes (ABC-DO) Study, by Country, and in Comparison With Previous Studies of Breast Cancer Survival in Sub-Saharan Africa Conducted Since 2010. Apart from Joko-Fru et al. 2019 and the CONCORD-3 publication, all studies were hospital-based. Only ABC-DO and Kantelhardt et al. 2014 were prospectively conducted.

| Population                                                                                       | Human development index | Definition of LFUP* | N at study start | Lost to follow up after 3 yrs<br>n | %  |  |
|--------------------------------------------------------------------------------------------------|-------------------------|---------------------|------------------|------------------------------------|----|--|
| <b>Current study: ABC-DO: prospective hospital-based study, active mHealth FU</b>                |                         |                     |                  |                                    |    |  |
| Nigeria, Aba and Owerri                                                                          | Medium                  | 6 months after      | 387              | 3                                  | 1  |  |
| Namibia, Windhoek                                                                                | Medium                  | 6 months after      | 481              | 10                                 | 2  |  |
| Uganda, Kampala                                                                                  | Low                     | 6 months after      | 421              | 24                                 | 6  |  |
| Zambia, Lusaka and Kabwe                                                                         | Low                     | 6 months after      | 201              | 40                                 | 20 |  |
| <b>Retrospective population-based cancer registry-based, active FU</b>                           |                         |                     |                  |                                    |    |  |
| <i>Joko-Fru et al. 2019</i>                                                                      |                         |                     |                  |                                    |    |  |
| Mauritius <sup>A</sup>                                                                           | High                    | censoring date      | 491              | 0                                  | 0  |  |
| Seychelles                                                                                       | High                    | censoring date      | 313              | 1                                  | 1  |  |
| Zimbabwe, Harare                                                                                 | Low                     | censoring date      | 174              | 1                                  | 1  |  |
| Namibia                                                                                          | Medium                  | censoring date      | 64               | 8                                  | 13 |  |
| Ethiopia, Addis                                                                                  | Low                     | censoring date      | 389              | 53                                 | 14 |  |
| Cote d'Ivoire, Abidjan                                                                           | Low                     | censoring date      | 209              | 45                                 | 22 |  |
| Mali, Bamako                                                                                     | Low                     | censoring date      | 48               | 11                                 | 23 |  |
| Mozambique, Maputo <sup>B</sup>                                                                  | Low                     | censoring date      | 42               | 12                                 | 28 |  |
| SA, Eastern Cape                                                                                 | Medium                  | censoring date      | 105              | 90                                 | 29 |  |
| Uganda, Kyadondo                                                                                 | Low                     | censoring date      | 114              | 38                                 | 34 |  |
| Kenya, Eldoret                                                                                   | Medium                  | censoring date      | 78               | 29                                 | 37 |  |
| Kenya, Nairobi                                                                                   | Medium                  | censoring date      | 141              | 55                                 | 39 |  |
| Zimbabwe, Bulawayo                                                                               | Low                     | censoring date      | 54               | 22                                 | 41 |  |
| Benin, Cotonou                                                                                   | Low                     | censoring date      | 91               | 49                                 | 51 |  |
| <sup>A</sup> Passive follow-up: Linkage of cancer registry records with population death records |                         |                     |                  |                                    |    |  |
| <sup>B</sup> only 1 year survival                                                                |                         |                     |                  |                                    |    |  |
| <b>Allemani et al. 2018 (CONCORD-3, population-based cancer registry)</b>                        |                         |                     |                  |                                    |    |  |
| Mali (Bamako) <sup>C</sup>                                                                       | Low                     | not provided        | 60               | 0                                  | 0  |  |
| Nigeria (Ibadan) <sup>C</sup>                                                                    | Medium                  | not provided        | 3962             | 0                                  | 0  |  |
| South Africa (Eastern Cape) <sup>C</sup>                                                         | Medium                  | not provided        | 733              | 113                                | 15 |  |
| <sup>C</sup> Data flagged as "less reliable" due to very high percentage of alive censoring      |                         |                     |                  |                                    |    |  |
| <b>Retrospective hospital-based, ambient FU</b>                                                  |                         |                     |                  |                                    |    |  |
| <i>Agboola et al. 2012</i>                                                                       |                         |                     |                  |                                    |    |  |
| Nigeria, Lagos                                                                                   | Medium                  | not provided        | 308              | 106                                | 34 |  |
| <i>Cubasch et al. 2018</i>                                                                       |                         |                     |                  |                                    |    |  |
| SA, Soweto                                                                                       | Medium                  | 6 months after      | 602              | 287                                | 42 |  |
| <i>Galukande et al. 2015</i>                                                                     |                         |                     |                  |                                    |    |  |
| Uganda, Kampala                                                                                  | Low                     | censoring date      | 475              | 213                                | 45 |  |
| <b>Prospective hospital-based, ambient FU</b>                                                    |                         |                     |                  |                                    |    |  |
| <i>Kantelhardt et al. 2014</i>                                                                   |                         |                     |                  |                                    |    |  |
| Ethiopia, Addis-Abeba                                                                            | Low                     | 6 months before     | 1070             | 231                                | 22 |  |

\* 6 months after: Updated vital status not known for at least 6 months from closing date to data extraction; 6 months before: Vital status not updated in the 6 months before the censoring date; Closing date: Vital status unknown at closing date; not provided: no or insufficient information provided in the manuscript
